# Supplementary material for: Morphological Correlates of Personality in Female Asian Particolored Bats (Vespertilio sinensis)
Source: Animals (Basel). 2020 Feb 12;10(2):289. doi: 10.3390/ani10020289 (PMC7070271; doi:10.3390/ani10020289)
Supplement: Supplementary File 1 [file animals-10-00289-s001.xls]

## Sheet: first board hole test
ID	Latency to enter(s)	Frequency of head dips	Latency to head dip in holes (edge)	Latency to head hip in holes (centre)	Locomotion	Echolocation	grooming	Urination and defecation
2X19CLL	60	0	600	600	24.13	16.09	0	0
2AN	60	0	600	600	26.46	29.66	12.46	0
2AR	22	0	600	600	91.74	4.73	0	0
2ARR	0	0	600	600	87.9	6.93	3.47	1
2AL	60	2	154.6	600	80.24	8.96	0	0
2ALR	48	0	600	600	42.3	15.82	8.59	2
2ALL	53.4	2	600	245	48.27	15.19	7.23	0
2BN	60	1	437	600	50.45	19.69	14.43	2
2BR	22.4	0	600	600	10.66	9.2	0	0
2BRR	60	2	491.6	485.4	59.06	13.66	0	1
2BL	60	0	600	600	21.45	31.55	0	2
2BLR	60	0	600	600	81.6	9.03	0.6	1
2BLL	60	3	285.4	507.4	83.71	10.23	2.7	2
2CN	8	0	600	600	60.28	7.36	0	1
2CR	60	0	600	600	74.71	11.23	9.03	2
2CRR	60	1	405	600	69.84	5	3.47	2
2CL	60	0	600	600	80.47	17.56	0.43	0
2CLR	60	3	383.8	3	82.11	3.77	2.6	2
2X11	21	0	600	600	81.77	7.33	5.33	2
2X12	60	1	496.6	600	69.95	6.23	9.36	0
2X18	60	0	600	600	28.86	28.49	0	1
2X2	41	0	600	600	68.81	2.57	9.6	2
2X6	12	3	238.6	330.4	87.2	9.5	0	0
319	60	3	200.4	130.6	78.47	13.03	0	4
3AN	48	0	600	600	47.15	7.46	35.39	0
3AR	16	0	600	600	77.04	9	2.63	2
3ARR	60	0	600	600	25.83	14.6	0	3
3AL	60	1	600	280.4	65.88	4.23	4.73	2
3ALR	60	1	282.2	600	71.28	14.76	0.77	2
3ALL	24.8	4	175.4	600	88.97	5.66	0.13	3
3BN	41	2	280.2	600	84.81	1.47	9.6	1
3BR	38	2	279.8	600	79.44	3.63	0.37	1
3BRR	16	1	266.6	600	66.84	13.63	0	1
3BL	60	5	467	323	73.41	10.16	0.27	2
3BLR	60	1	520.2	600	35.49	12.03	0	0
3BLL	9.6	0	600	600	43.72	12.93	0	0
3CN	60	0	600	600	19.52	34.46	0	1
3CR	60	0	600	600	62.31	14.36	0.13	1
3CRR	24.6	0	600	600	40.75	21.56	1.63	0
3CLR	60	0	600	600	31.22	10.73	6.83	1
3CL	13	0	600	600	65.74	25.29	0.3	1
3CLL	42	1	600	508	80.94	13.23	0	2
3X5	60	0	600	600	37.92	12.36	3.17	0
1AR	60	3	480	210.8	66.01	14.96	4.5	1
1ARR	23.4	0	600	600	8.27	20.33	46.02	2
1BR	28.2	4	191.8	103.8	83.24	8.2	2.03	1
1BRR	60	0	600	600	63.61	23.59	2.67	0
1BL	24.6	2	372.2	531.2	75.71	16.16	0	3
1BLR	13.6	0	600	600	44.12	20.63	5.93	0
1CR	60	0	600	600	15.43	40.39	8.03	0
1CL	60	0	600	600	16.72	21.86	6.36	1
1CLR	37	0	600	600	23.4	3.67	25.26	3

## Sheet: second board hole test
ID	Latency to enter	Frequency of head dips	Latency to head dip in holes (edge)	Latency to head hip in holes (centre)	Locomotion	Echolocation	grooming	Urination and defecation
2X19CLL	60	0	600	600	0.67	23.59	4.03	1
2AN	30.6	0	600	600	53.34	16.16	12.03	3
2AR	3	2	139.8	541.2	81.94	16.89	0	2
2ARR	60	0	600	600	2.83	15.69	62.61	1
2AL	18	4	416.2	173.6	65.18	27.26	4.33	1
2ALR	12	4	339.6	600	86.48	12.2	0	3
2ALL	13.8	2	487.2	513.8	74.81	17.19	0	1
2BN	60	0	600	600	0	8.03	0	0
2BR	60	0	600	600	17.42	7.03	0	0
2BRR	60	0	600	600	6.56	7.5	0	0
2BL	60	0	600	600	42.55	17.13	17.89	1
2BLR	16.6	2	600	506.4	59.08	18.26	6.7	1
2BLL	60	0	600	600	11.96	17.99	31.66	0
2CN	36	0	600	600	5.73	6.63	0	0
2CR	11	0	600	600	44.72	15.53	6.36	3
2CRR	14	2	505.6	416.4	79.54	12.83	0	1
2CL	60	2	209.2	600	47.46	7.6	9.23	2
2CLR	10.8	6	186.8	175.4	67.94	13.1	5.33	1
2X11	60	0	600	600	40.66	19.89	0.63	0
2X12	60	0	600	600	0	14.2	0	3
2X18	60	1	600	594.2	29.76	24.49	1.8	1
2X2	60	0	600	600	0	6.36	0	0
2X6	23.8	0	600	600	65.51	10.43	1.1	1
319	60	0	600	600	12.52	12.7	0	0
3AN	60	0	600	600	25	21.63	9.83	1
3AR	27	0	600	600	6.6	2.23	38.95	0
3ARR	26	2	383	600	71.57	15.83	0	0
3AL	4	0	600	600	15.26	4.7	55.18	0
3ALR	60	0	600	600	0	0	0	0
3ALL	60	0	600	600	1.4	14.53	0	0
3BN	20	0	600	600	13.16	14.13	0	1
3BR	20	0	600	600	9.6	11.73	31.82	3
3BRR	18	0	600	600	8.03	5.5	52.48	0
3BL	13	2	154.8	95	44.45	16.13	19.39	3
3BLR	60	1	600	140.4	10.93	13.36	1.73	0
3BLL	44.8	4	202	600	72.44	9.06	0	0
3CN	60	0	600	600	3.4	9.16	61.75	1
3CR	16.4	4	189	600	72.05	18.63	0	0
3CRR	9.2	0	600	600	10.6	12.53	0	0
3CLR	60	0	600	600	33.02	6.03	3.17	0
3CL	60	0	600	600	33.02	6.03	3.17	0
3CLL	9	0	600	600	83.34	8.6	0	1
3X5	60	0	600	600	2.57	11.1	0	0
1AR	60	0	600	600	0	6.56	0	0
1ARR	60	0	600	600	0	13.4	0	0
1BR	10.6	9	229.4	207.2	76.14	5.86	1.53	2
1BRR	3.8	0	600	600	12.93	24.76	3.43	2
1BL	60	1	99	600	11.2	24.36	16.56	2
1BLR	60	1	600	248.4	25.12	22.73	12.96	2
1CR	60	0	600	600	3.87	19.89	2	1
1CL	60	0	600	600	0	5.43	1.3	3
1CLR	60	0	600	600	0.77	13.13	23.13	2

## Sheet: body size and aggressivity
ID	bodymass	Forearmlength	Headbodylength	Month	Group	Number of attacks initiated	Total number of battles in the group
2BN	20	51.43	61.73	7	2B	45	214
2BL	18.59	47.83	56.94	7	2B	25	214
2BR	15.98	50	56.97	7	2B	36	214
2BLL	14.75	50.34	54.43	7	2B	21	214
2BRR	15	51.24	58.21	7	2B	37	214
2BLR	16.71	49.09	58.36	7	2B	50	214
2AN	20.58	49.17	63.23	7	2A	74	171
2AL	16.77	51.35	55.68	7	2A	17	171
2AR	15.95	52.06	61.68	7	2A	12	171
2ALL	16.25	50.28	51.68	7	2A	39	171
2ARR	16.51	51.17	58.66	7	2A	15	171
2ALR	20.47	50.89	61.2	7	2A	14	171
3BN	15.48	48.2	60.35	8	3B	25	242
3BL	16.95	50.24	56.02	8	3B	106	242
3BR	15.01	45.12	57.64	8	3B	10	242
3BLL	17.38	48.06	65.36	8	3B	6	242
3BRR	16.11	48.8	55.42	8	3B	80	242
3BLR	18.32	46.04	56.81	8	3B	15	242
3AN	15.93	45.64	60.48	8	3A	20	123
3AL	17.92	49.5	59.09	8	3A	26	123
3AR	16.48	47.52	63.04	8	3A	15	123
3ALL	17.13	49.07	51.81	8	3A	40	123
3ARR	18.4	48.12	59.11	8	3A	14	123
3ALR	15.24	48.48	56.09	8	3A	8	123
2X19CLL	20.11	53.9	65.61	7	2C	2	89
2CN	18.72	47.11	53.71	7	2C	16	89
2CR	16.06	49.94	60.53	7	2C	18	89
2CRR	14.16	48.04	50.93	7	2C	13	89
2CL	25.35	53.69	63.48	7	2C	26	89
2CLR	15.54	50.89	57.15	7	2C	14	89
3CN	17.65	48.36	59.72	8	3C	19	175
3CR	20.71	48.04	62.72	8	3C	41	175
3CRR	16.58	44.71	61.73	8	3C	22	175
3CLR	14.8	47.07	50.62	8	3C	21	175
3CL	19.37	47.81	58.48	8	3C	27	175
3CLL	18.78	49.61	62.05	8	3C	45	175
2X11	16.14	51.6	62.15	7	2
2X12	15.83	49.86	53.69	7	2
2X18	17.52	49.04	53.69	7	2
2X2	16.44	49.88	59.29	7	2
2X6	15.69	50.21	56.31	7	2
319	19.41	48.27	59.72	8	3
3X5	19.02	50.31	62.59	8	3
1AR	21.65	51.41	59.35	6	1A
1ARR	21.16	49.36	55.86	6	1A
1BR	19.67	46.65	59.99	6	1B
1BRR	18.87	47.98	61.17	6	1B
1BL	18.54	51.74	58.51	6	1B
1BLR	20.44	48.59	57.9	6	1B
1CR	19.76	51.75	60.31	6	1C
1CL	20.82	49.3	57.01	6	1C
1CLR	17.48	49.22	55.34	6	1C
